# Supplementary material
Source: publisher site journal article supplement (https://www.dovepress.com/article/318787)
Supplement: Supplementary file 1 [file get_supplementary_file.php]

## Supplementary materials

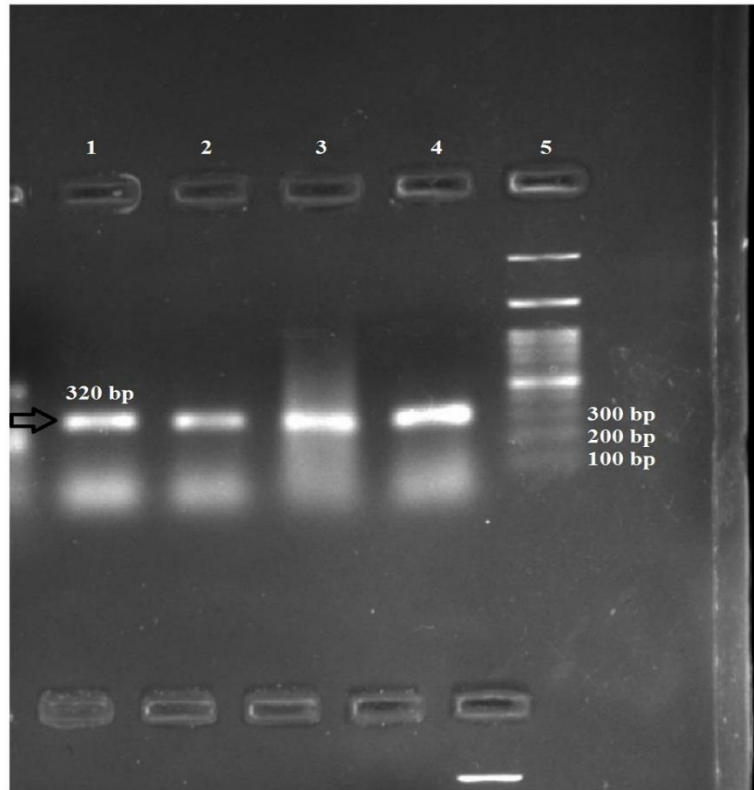

**Supplementary Figure S1.** Gel electrophoresis showing the amplified product of *mcr-1* gene (320 bp).

Lanes 1, 2, 3 and 4: *mcr-1* positive isolates (band size 320 bp).

Lane 5: 100 bp DNA ladder (Qiagen, USA).



**Supplementary Table S1.** Multiple alignment of *mcr-1* gene sequencing chromatograms of the study isolates

|                                        |                  |                                                              |
|----------------------------------------|------------------|--------------------------------------------------------------|
| First line of the 3 isolates sequence  | Isolate no. (79) | TATCCCATCGCGGACAATCTCGGCTTTGTGCTGACGATCGCTGTCGTGCTCTTTGGCGCG |
|                                        | Isolate no. (55) | -----TGACGATCGCTGTCGTGCTCTTTGGCGCG                           |
|                                        | Isolate no. (56) | -----ACAATCTCGGCTTTGTGCTGACGATCGCTGTCGTGCTCTTTGGCGCG         |
|                                        |                  | *****                                                        |
| Second line of the 3 isolates sequence | Isolate no. (79) | ATGCTACTGATCACCACGCTGTTATCATCGTATCGCTATGTGCTAAAGCCTGTGTTGATT |
|                                        | Isolate no. (55) | ATGCTACTGATCACCACGCTGTTATCATCGTATCGCTATGTGCTAAAGCCTGTGTTGATT |
|                                        | Isolate no. (56) | ATGCTACTGATCACCACGCTGTTATCATCGTATCGCTATGTGCTAAAGCCTGTGTTGATT |
|                                        |                  | *****                                                        |
| Third line of the 3 isolates sequence  | Isolate no. (79) | TTGCTATTAATCATGGGCGCGGTGACCAATTATTTACTCACGC-----             |
|                                        | Isolate no. (55) | TTGCTATTAATCATGGGCGCGGTGACCAGTTATTTACTGACACTTATGGCACGGTCTAT  |
|                                        | Isolate no. (56) | TTGCTATTAATCATGGGCGCGGTGACCAGTTATTTACTGACACTTATGGCACGGTCTAT  |
|                                        |                  | ***** ** *                                                   |
| Fourth line of the 3 isolates sequence | Isolate no. (79) | -----                                                        |
|                                        | Isolate no. (55) | GATACGACCATGCTCCAAAATGCCCTACAGACCGACCAAGC-                   |
|                                        | Isolate no. (56) | GATACGACCATGCTCCAAAATGCCCTACAGACCGACCAAGCC                   |

\* : the identical bases of the three isolates
